# Supplementary material
Source: MDPI journal article supplement (https://www.mdpi.com/2073-4344/12/2/190)
Supplement: s1 [file s1]

## Supplementary Material

### Text S1

The energy cost in the electrochemical oxidation system can be calculated according to Eq. (S1):

$$E_{EO} = \frac{SjUt}{V \log(C_0 / C)} \quad (S1)$$

where  $E_{EO}$  is the electric energy consumed to degrade the concentration of NB by one order of magnitude in 1 L solution ( $\text{Wh L}^{-1}$ );  $S$ ,  $j$ ,  $U$  and  $V$  are the anode surface area ( $\text{cm}^2$ ), applied current density ( $\text{mA cm}^{-2}$ ), average voltage (V), and the volume of the reaction solution (mL);  $C_0$  and  $C$  are the initial and final concentrations of NB ( $\text{mg L}^{-1}$ );  $t$  is the time (min) needed to degrade NB from the initial concentration to the final concentration.

### Text S2

Hydroxyl radicals ( $\bullet\text{OH}$ ) produced by the electrodes are determined with Salicylic Acid (SA) as a radical scavenger. The hydroxylated products of 2,3-dihydroxybenzoic Acid (2,3-DHBA) and 2,5-dihydroxybenzoic Acid (2,5-DHBA) were analyzed by HPLC (Dionex U3000, USA), equipped with an WpH C18 column ( $4.6 \text{ nm} \times 250 \text{ mm}$ ,  $5 \mu\text{m}$ ) The UV detector at  $\lambda=320 \text{ nm}$ . The mobile phase was a mixture of Milli-Q water with 1% phosphoric acid (A) and acetonitrile (B) (70:30, V: V) at a flow rate of  $1.0 \text{ mL min}^{-1}$ . The injection volume was  $20 \mu\text{L}$  and the total analysis time was 18 min. During the electrochemical oxidation process, only the hydroxylated product 2,5-DHBA was detected. Thus the concentration of  $\bullet\text{OH}$  is equal to the concentration of 2,5-DHBA according to the reaction stoichiometry. The apparent rate constant of  $\bullet\text{OH}$  production on the anode could be expressed as  $k_{[\bullet\text{OH}]}$  ( $\text{mM}/(\text{min}\cdot\text{m}^2)$ ), which was calculated as follows:

$$k_{[\bullet\text{OH}]} = \frac{dC(\bullet\text{OH})}{Sdt} \quad (S2)$$

where  $k_{[\bullet\text{OH}]}$  is the apparent rate constants of  $\bullet\text{OH}$  production ( $\text{mM}/(\text{min}\cdot\text{m}^2)$ ), i.e. the concentration of  $\bullet\text{OH}$  yield per min per unit anode area.  $S$  is the anode surface area ( $\text{m}^2$ ).  $C(\bullet\text{OH})$  is the concentration of  $\bullet\text{OH}$  trapped by SA (mM), and  $t$  is the reaction time.

### Text S3

Titanium sheets (purity 99.9%,  $50 \text{ mm} \times 50 \text{ mm} \times 1 \text{ mm}$ ) were sanded with 200, 400 and 600 grit sandpapers to remove surface oxide layer, then immersed in 10% NaOH solution for 60 min and etched with 5% oxalic acid solution at  $95^\circ \text{C}$  for 120 min to gain a gray surface with uniform roughness. The middle layer ( $\text{SnO}_2\text{-Sb}$ ) was prepared by the sol-gel technique with a coating solution containing ethylene glycol, citric acid,  $\text{SnCl}_4 \cdot 4\text{H}_2\text{O}$  and  $\text{SbCl}_3$  with a molar ratio of 140: 30: 9:1. The sol-gel solution was covered on the Ti sheets by the dip-coating method. Then, the Ti sheets were dried at  $145^\circ \text{C}$  for 10 min and sintered at  $500^\circ \text{C}$  for 10 min in a muffle furnace. This procedure was repeated 20 cycles, and the last cycle was annealed for 2 h at  $500^\circ \text{C}$  to obtain Ti/ $\text{SnO}_2\text{-Sb}$ . The Ce-PbO<sub>2</sub> layer was acquired by electrodeposition with Ti/ $\text{SnO}_2\text{-Sb}$  as the anode and two Ti plates as the cathodes. The electrodeposition was conducted under  $20 \text{ mA cm}^{-2}$  for 60 min, and the electrolyte consisted of 0.1 M  $\text{HNO}_3$ ,  $200 \text{ g L}^{-1} \text{ Pb}(\text{NO}_3)_2$ ,  $0.4 \text{ g L}^{-1} \text{ Ce}(\text{NO}_3)_3$ , and  $0.5 \text{ g L}^{-1} \text{ NaF}$ .

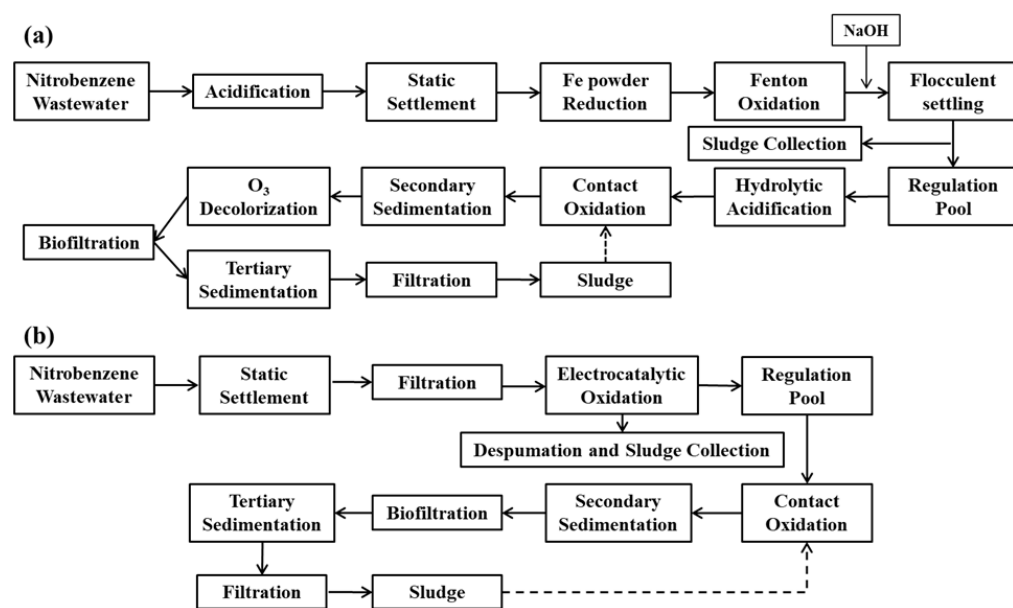

**Figure S1.** The flowcharts of the wastewater treatment processes before (a) and after (b) reform in the chemical plant.

**Table S1.** Intermediates of NB identified by GC-MS/MS in electrospray ionization positive mode.

| Compound              | Molecular weight | Molecular structure | Retention time (min) |
|-----------------------|------------------|---------------------|----------------------|
| Nitrobenzene          | 123.11           |                     | 8.13                 |
| Aniline               | 93.13            |                     | 9.14                 |
| Hydroquinone          | 110.11           |                     | 8.42                 |
| Resorcinol            | 110.11           |                     | 8.84                 |
| <i>o</i> -Nitrophenol | 139.11           |                     | 9.26                 |
| <i>m</i> -Nitrophenol | 139.11           |                     | 14.17                |
| <i>p</i> -Nitrophenol | 139.11           |                     | 14.63                |
| Phenol                | 94.11            |                     | 7.54                 |
| Benzoquinone          | 108.10           |                     | 7.35                 |

**Table S2.** The operating costs of electrochemical oxidation unit and the replaced Fenton-flocculant precipitant process.

| Item                  | Operating costs (Yuan/ton)    |                           |
|-----------------------|-------------------------------|---------------------------|
|                       | Fenton-flocculant precipitant | Electrochemical oxidation |
| Energy cost           | 7                             | 19.95                     |
| Agent fee             | 239                           | 5                         |
| Sludge disposal       | 1600                          | 300                       |
| Equipment maintenance | 50                            | 30                        |
| Total                 | 1896                          | 355                       |
